# Supplementary material for: The impact of human activities on Australian wildlife
Source: PLoS One. 2019 Jan 23;14(1):e0206958. doi: 10.1371/journal.pone.0206958 (PMC6344025; doi:10.1371/journal.pone.0206958)
Supplement: S1 Table — (XLSX) [file pone.0206958.s003.xlsx]

## Sheet: SUPPTbl1_AdmissionsOverTime
Supporting Table 1: Number of monthly admissions per species or multi-species groups between January 2006 and December 2017 (inclusive). Cells are shaded following a heatmap for each animal group.
Animal Group			AVIANS										REPTLIES								AMPHIBIANS	MARSUPIALS								EUTHERIAN MAMMALS
Year		Month	Australian Brush-turkey	Australian Magpie	Australian Pelican	Fig Bird	Laughing Kookaburra	Lorikeets	Native Ducks	Noisy Minor	Raptors	Tawny Frog Mouth	Bearded Dragon	Blue-tongued Skink	Carpet Python	Eastern Water Dragon	Freshwater Turtle	Green Tree Snake	Lace Monitor	Venomous Snakes	Tree Frogs	Bandicoots	Eastern Grey Kangaroo	Feathertail Glider	Koala	Large Gliders	Marsupial Dasyurid	Possums	Small Macropods	Echidna	Microbats	Flying Foxes
Total admissions			433	1261	256	762	1729	2625	945	837	351	1920	414	919	896	853	647	242	309	295	106	362	1155	230	3590	763	190	5615	1139	453	303	2026
% of total			0.0136913	0.0398723	0.00809461	0.0240941	0.0546702	0.0830013	0.0298805	0.0264656	0.0110985	0.0607095	0.0130905	0.0290584	0.0283311	0.0269715	0.0204579	0.00765193	0.00977044	0.00932777	0.00335167	0.0114463	0.0365206	0.0072725	0.113514	0.0241257	0.00600772	0.177544	0.0360147	0.0143237	0.00958072	0.0640612
Total per group			11119										4575								106	13044								2782
% per group			0.351578										0.144659								0.00335167	0.412445								0.0879656
2006	Summer	January	1	6	1	3	2	6	0	2	2	4	2	3	5	0	1	0	0	0	0	1	4	0	7	1	0	12	3	0	2	2
		Februrary	1	1	2	1	3	6	2	0	0	10	0	0	1	1	4	0	2	0	0	1	3	0	10	1	1	9	4	0	1	2
	Autumn	March	1	3	1	0	3	12	1	0	0	12	2	3	0	2	3	0	3	0	1	0	2	0	7	0	0	8	9	1	0	3
		April	1	3	4	0	9	5	0	0	5	17	3	1	1	3	2	0	0	0	0	0	4	0	14	4	0	10	9	2	1	5
		May	0	0	1	0	6	2	1	0	1	7	0	1	1	0	2	0	0	3	0	0	9	1	10	2	0	10	5	3	0	5
	Winter	June	0	1	0	1	4	5	1	0	0	8	0	2	2	1	1	0	0	0	0	0	12	3	18	6	1	7	5	2	0	4
		July	0	1	3	0	3	2	0	1	2	4	0	1	0	0	1	0	0	0	1	0	5	1	25	2	0	12	10	2	0	2
		August	0	2	2	0	9	2	2	3	0	9	1	5	4	0	0	2	1	0	0	1	7	1	28	0	0	11	5	0	0	0
	Spring	September	1	3	2	1	8	4	4	3	1	3	9	0	7	4	2	3	0	3	0	1	9	1	26	2	0	11	3	1	0	3
		October	3	12	2	0	11	11	2	4	4	6	7	1	2	3	2	2	3	1	0	3	4	1	20	4	1	19	7	3	0	13
		November	3	5	0	4	6	18	3	4	0	6	1	3	2	2	0	1	1	2	0	0	4	1	23	5	2	13	8	1	1	9
	Summer	December	4	8	0	6	17	17	2	3	0	13	4	10	0	3	7	0	1	1	1	3	8	1	24	5	5	22	5	3	0	6
2007		January	2	4	1	4	3	11	2	4	2	9	3	6	4	3	0	2	6	0	0	1	6	1	10	7	0	15	12	1	1	1
		Februrary	1	2	1	1	7	6	2	0	2	7	3	4	1	2	5	2	2	0	1	2	3	0	9	0	0	7	2	3	0	5
	Autumn	March	0	1	1	0	8	3	1	1	1	7	3	1	3	4	3	0	2	1	0	0	4	2	12	3	0	17	2	0	0	5
		April	0	1	0	0	11	7	0	0	2	12	3	3	4	3	2	0	1	5	0	2	4	3	9	1	0	13	3	4	0	5
		May	0	1	1	1	9	12	0	0	3	8	0	1	5	0	4	0	0	2	0	3	3	3	10	6	0	8	8	5	0	7
	Winter	June	0	0	2	0	3	4	0	2	4	8	4	0	8	0	3	0	0	0	0	1	0	0	13	3	0	13	11	4	0	6
		July	0	2	3	2	4	1	1	0	4	10	1	0	0	0	1	0	0	0	0	2	13	0	28	7	0	15	14	3	0	16
		August	1	4	3	1	8	4	5	0	4	3	11	9	3	1	9	0	0	1	0	0	15	0	37	7	0	20	11	5	0	3
	Spring	September	1	3	1	2	8	0	1	1	2	8	8	7	11	6	2	5	1	0	0	1	6	1	32	6	0	23	11	2	0	5
		October	7	10	3	0	11	10	3	5	2	12	6	6	6	9	3	0	4	7	0	4	7	2	30	4	0	39	6	5	0	7
		November	4	6	2	4	19	9	3	5	2	17	4	2	4	6	4	1	2	4	1	3	7	0	17	5	1	22	8	3	0	27
	Summer	December	3	10	3	12	14	12	6	9	2	8	0	6	6	6	6	2	0	2	1	2	10	1	14	7	2	15	7	0	1	5
2008		January	4	10	4	9	16	6	4	4	2	16	3	6	5	5	9	0	2	2	1	1	5	0	14	5	1	24	7	0	0	9
		Februrary	5	1	5	8	0	7	12	0	1	15	2	6	3	4	7	3	2	2	2	0	5	0	7	12	0	18	7	2	0	7
	Autumn	March	3	5	1	2	14	10	14	2	3	17	3	5	4	2	2	0	2	0	0	1	6	1	6	3	0	22	8	5	2	7
		April	1	5	2	0	9	14	3	2	1	24	0	5	4	1	3	1	2	1	2	0	1	0	10	3	0	26	7	2	0	3
		May	2	0	0	1	6	4	6	6	3	7	2	0	3	2	5	1	1	2	0	0	7	0	20	5	0	23	12	3	0	2
	Winter	June	3	3	1	0	8	5	1	5	3	10	0	0	3	3	1	0	0	0	0	3	7	3	16	3	0	19	12	4	0	4
		July	0	2	4	0	12	8	4	4	1	8	1	5	0	0	0	0	0	1	0	1	13	0	15	7	0	21	7	1	0	6
		August	0	4	8	0	16	14	28	7	2	5	6	5	6	1	1	1	3	1	0	1	10	1	22	5	0	36	7	3	1	13
	Spring	September	7	16	4	1	13	7	4	11	2	11	4	11	7	7	3	1	2	0	0	0	15	2	28	6	0	23	9	3	0	6
		October	2	24	9	4	18	11	15	18	3	10	5	10	4	7	1	3	3	2	1	2	7	1	28	6	0	40	7	3	0	12
		November	2	19	3	13	18	28	5	11	5	33	4	10	4	12	5	0	1	2	4	5	8	6	21	6	0	31	12	1	3	20
	Summer	December	3	7	1	10	19	10	5	5	1	7	4	24	4	8	6	2	4	1	2	1	6	2	29	6	2	46	5	2	17	24
2009		January	3	14	5	12	4	5	13	9	1	9	3	13	5	3	2	3	6	2	2	5	8	0	17	5	0	29	7	1	0	4
		Februrary	1	3	0	6	7	12	10	0	1	21	6	12	43	12	6	0	3	4	0	1	13	0	12	1	0	24	4	0	1	7
	Autumn	March	1	2	1	1	8	3	2	3	1	15	4	5	5	6	8	2	3	1	1	3	15	0	20	0	0	24	18	3	0	7
		April	0	7	3	1	9	13	3	4	0	13	1	1	3	5	17	1	1	1	0	1	6	0	16	3	0	24	12	5	0	6
		May	0	0	2	2	16	9	4	3	2	13	0	3	4	1	7	1	0	3	0	2	13	3	19	6	1	18	18	4	1	7
	Winter	June	2	4	1	0	10	6	4	0	3	15	1	1	4	0	4	0	0	0	0	0	10	3	20	6	1	17	11	5	0	1
		July	1	3	2	0	10	5	5	2	2	6	2	4	2	1	1	0	0	1	0	1	9	2	28	8	0	35	13	4	0	2
		August	1	2	5	2	4	9	6	12	4	10	7	13	8	5	0	2	2	3	0	3	9	5	48	10	0	57	13	8	0	2
	Spring	September	4	5	4	4	7	8	7	8	2	7	6	7	12	7	3	5	3	2	1	6	14	2	38	6	1	49	10	2	1	3
		October	1	30	2	2	3	12	0	6	3	22	4	3	3	6	1	2	3	0	1	9	12	2	46	7	5	60	8	1	8	13
		November	8	9	1	9	12	7	5	8	2	16	3	22	6	15	1	1	2	5	0	0	5	0	25	3	6	62	6	1	6	8
	Summer	December	7	5	1	15	20	22	4	5	7	18	2	10	11	23	7	3	3	4	1	1	7	1	29	4	6	42	3	1	4	4
2010		January	5	3	1	11	6	8	15	4	1	9	0	5	4	7	1	6	3	10	0	9	12	0	21	9	0	55	10	1	0	7
		Februrary	3	2	1	6	8	6	11	1	1	8	1	4	4	3	9	7	3	5	1	1	10	0	12	6	0	32	3	1	0	16
	Autumn	March	2	1	2	0	8	15	3	5	0	12	0	7	1	3	10	4	0	1	0	1	9	1	11	8	0	35	11	3	0	18
		April	3	0	1	0	10	13	7	6	0	14	0	5	2	1	2	0	0	2	0	0	10	0	9	1	0	34	8	1	2	16
		May	1	1	0	1	10	14	15	4	1	11	2	5	7	1	1	2	1	1	1	6	10	0	13	4	0	41	11	6	2	22
	Winter	June	2	3	1	3	11	6	1	1	2	9	0	2	3	0	1	0	1	0	1	4	9	0	20	2	0	25	17	5	0	24
		July	1	2	5	3	5	0	4	3	1	7	1	6	1	0	1	1	0	0	0	1	14	1	24	2	0	48	10	2	0	23
		August	1	3	4	5	10	8	12	23	2	7	8	0	1	1	0	1	0	2	1	2	15	7	26	9	0	76	10	6	1	17
	Spring	September	4	10	5	3	18	22	4	13	3	18	5	8	8	5	2	3	0	3	0	4	7	2	36	9	0	50	8	4	1	13
		October	8	35	3	1	9	28	29	13	3	19	5	7	5	4	8	3	3	4	2	2	14	2	32	18	0	61	7	3	0	31
		November	4	8	3	7	17	19	14	12	2	27	4	8	4	5	5	2	2	4	0	3	11	0	22	8	22	45	8	8	1	30
	Summer	December	5	12	2	35	34	21	10	7	1	21	29	5	5	24	13	1	1	2	1	5	5	0	21	5	10	44	6	0	5	83
2011		January	3	4	2	11	18	21	28	3	2	17	13	16	19	29	21	1	2	0	1	5	7	1	13	3	2	61	5	0	4	9
		Februrary	6	4	1	8	12	7	17	1	0	15	4	5	5	2	7	3	2	1	0	4	12	0	16	1	0	47	5	1	1	4
	Autumn	March	5	3	0	1	9	8	10	3	3	17	0	5	3	3	3	2	1	1	0	1	1	0	11	4	0	36	6	1	2	16
		April	1	2	0	0	8	10	2	3	0	23	2	3	7	3	7	0	1	2	1	1	6	0	11	6	0	22	10	3	1	6
		May	5	4	0	2	10	3	2	1	1	19	1	8	2	0	5	2	1	3	0	2	4	1	12	6	0	32	5	5	0	7
	Winter	June	1	3	1	1	3	3	3	4	0	10	1	1	6	0	2	0	1	0	0	0	12	1	16	5	0	40	14	6	0	3
		July	0	4	0	0	6	10	4	5	0	9	0	3	3	1	0	0	1	1	0	2	4	2	29	6	0	30	11	8	0	3
		August	2	3	3	1	9	19	5	16	2	13	5	2	6	1	2	1	0	0	1	4	9	1	36	9	1	61	11	10	0	5
	Spring	September	2	14	2	1	8	20	1	10	0	7	3	9	12	7	1	4	0	4	0	3	8	1	34	8	0	52	9	7	0	22
		October	4	21	0	5	8	46	9	16	2	19	8	6	7	11	3	3	1	5	0	1	12	4	29	13	0	62	7	5	0	43
		November	5	11	0	11	13	28	3	7	1	17	2	7	3	20	1	1	1	2	1	10	6	2	29	11	5	53	5	2	1	17
	Summer	December	5	9	0	19	25	37	2	7	3	5	1	4	6	32	4	1	1	1	0	10	5	2	25	5	9	40	3	2	2	9
2012		January	3	6	0	16	15	19	7	4	1	12	2	8	3	12	7	2	1	1	0	2	8	0	16	6	0	52	10	2	1	5
		Februrary	2	1	0	11	6	14	11	2	1	7	2	5	3	3	7	1	1	1	0	2	6	0	16	1	0	36	8	1	3	7
	Autumn	March	3	1	0	2	11	9	4	4	0	13	0	4	3	2	5	2	1	1	0	3	7	1	10	1	0	15	2	3	2	9
		April	0	3	2	0	5	12	4	3	1	8	0	3	2	3	2	0	1	1	2	5	6	0	9	2	0	20	8	5	1	7
		May	0	1	0	0	8	9	0	0	0	10	0	1	2	2	3	2	0	1	0	1	2	1	11	2	0	24	19	1	0	3
	Winter	June	1	0	0	0	3	3	3	2	0	6	0	1	6	1	3	0	0	0	0	0	2	11	18	4	0	20	3	4	0	7
		July	1	6	3	0	3	0	1	0	1	2	0	1	2	1	2	2	0	2	0	0	6	5	13	3	0	27	8	3	0	14
		August	2	3	0	0	4	9	3	3	5	6	2	11	3	1	1	4	2	2	0	1	7	1	36	2	1	34	9	3	0	11
	Spring	September	4	15	2	0	22	11	5	6	3	12	2	3	9	6	1	6	3	2	0	7	4	4	46	4	1	38	11	3	0	2
		October	6	30	0	3	9	8	4	9	4	6	5	4	3	8	1	1	5	1	0	4	6	1	41	5	0	40	7	3	0	21
		November	1	13	0	8	6	16	5	14	2	13	1	7	4	5	5	1	5	0	1	3	2	2	26	4	4	44	1	3	6	31
	Summer	December	6	12	0	13	9	14	2	3	5	10	0	5	3	5	4	0	4	0	0	2	2	0	27	1	9	40	2	1	2	10
2013		January	5	4	0	15	23	13	1	0	4	5	0	0	4	7	4	1	2	2	0	5	8	2	17	3	0	42	5	0	1	12
		Februrary	5	7	1	11	15	17	4	3	1	10	1	8	5	3	10	5	3	2	0	4	10	1	14	9	0	28	4	0	1	27
	Autumn	March	3	7	0	0	15	10	16	4	2	6	1	6	2	10	10	1	1	3	0	2	3	0	14	2	0	29	8	4	1	22
		April	1	2	4	3	3	20	6	2	3	11	0	3	1	4	6	2	5	2	1	2	10	1	18	4	0	43	6	2	1	16
		May	0	13	5	0	6	12	6	2	4	10	0	2	4	2	4	1	0	3	0	3	7	4	23	3	0	31	11	4	2	15
	Winter	June	0	13	0	0	7	23	8	3	3	9	0	1	5	1	1	0	5	0	1	2	4	1	39	3	0	24	10	4	2	27
		July	1	9	7	2	7	12	10	1	6	6	0	2	2	0	3	1	3	1	0	3	10	1	47	0	0	44	5	6	0	20
		August	2	8	10	1	12	12	21	8	8	10	7	13	5	5	2	2	3	0	0	5	6	3	52	4	0	45	7	5	1	27
	Spring	September	3	26	0	2	19	21	8	7	2	10	6	7	10	8	2	4	4	1	0	3	12	0	59	6	0	55	6	3	0	14
		October	4	34	0	3	15	44	2	18	2	17	3	2	5	20	3	2	2	7	1	2	16	1	57	6	0	67	1	5	2	22
		November	7	17	6	18	22	33	10	15	7	24	1	21	4	8	5	5	3	3	2	3	3	2	62	8	2	49	6	1	3	46
	Summer	December	5	15	1	9	19	38	1	1	5	16	5	6	7	16	11	1	3	2	1	5	7	1	63	9	16	45	6	2	8	21
2014		January	11	10	2	17	10	24	10	5	4	16	1	9	4	8	1	3	5	0	5	8	7	0	55	10	1	56	7	1	4	38
		Februrary	11	5	0	12	16	18	5	5	4	13	1	5	4	3	5	2	0	5	0	8	7	2	39	1	0	54	5	3	5	18
	Autumn	March	4	6	3	2	14	54	9	3	0	24	4	2	7	9	11	4	0	1	2	0	14	4	31	7	0	63	9	5	4	8
		April	0	4	1	1	13	17	2	5	1	32	0	8	10	7	6	0	0	2	1	0	7	3	30	7	0	42	15	2	4	12
		May	3	5	1	0	11	14	1	7	3	17	1	3	5	2	1	1	2	0	1	2	14	3	27	2	0	47	5	9	2	14
	Winter	June	3	9	1	0	9	14	3	3	7	11	0	4	2	1	1	2	7	0	0	1	6	1	31	7	1	33	7	8	2	8
		July	1	3	3	0	10	25	6	5	7	14	0	1	5	3	1	0	7	0	0	2	5	2	54	6	0	44	10	4	6	21
		August	1	7	4	5	13	55	5	5	7	9	1	8	6	2	2	0	2	0	0	1	9	7	42	11	1	50	5	1	1	12
	Spring	September	1	16	5	7	19	44	6	9	6	13	5	9	11	7	1	0	2	4	0	3	11	7	50	6	1	68	4	5	1	24
		October	5	27	1	4	21	43	12	14	5	12	3	7	8	12	5	2	4	8	3	1	9	2	55	9	0	60	8	5	0	39
		November	3	25	4	10	22	57	8	13	5	21	3	5	7	11	6	2	5	3	1	2	7	1	53	9	1	61	9	0	10	27
	Summer	December	4	18	6	12	23	56	2	17	3	19	1	16	3	13	14	0	3	3	1	4	13	2	33	6	19	54	9	0	6	6
2015		January	4	11	2	15	23	58	13	6	4	16	1	7	18	14	13	4	6	7	4	0	10	2	23	3	0	49	3	2	9	12
		Februrary	1	11	2	24	12	34	18	7	1	16	0	4	5	11	10	1	2	2	2	4	4	0	19	1	1	40	3	4	5	19
	Autumn	March	7	10	1	3	15	41	12	7	1	29	1	1	15	10	9	4	2	5	1	2	3	0	12	6	0	33	2	3	2	11
		April	5	6	2	2	15	31	5	12	3	21	0	6	2	1	8	1	0	6	3	3	5	0	17	2	0	39	6	5	1	3
		May	2	8	4	0	11	16	5	3	2	18	0	3	4	2	7	3	0	3	0	0	8	1	17	4	0	26	7	10	3	1
	Winter	June	2	1	2	0	6	13	1	4	0	19	0	1	4	1	5	1	1	0	1	1	13	3	24	3	0	37	5	6	1	6
		July	1	6	4	2	10	17	1	7	3	3	2	2	3	2	2	0	2	2	2	2	13	1	36	7	0	28	8	6	0	8
		August	1	8	1	3	20	30	21	7	1	8	2	14	15	1	1	2	1	2	0	8	6	0	46	5	0	44	9	7	0	6
	Spring	September	3	16	3	3	19	25	15	11	1	5	9	11	12	8	1	4	5	2	0	0	9	0	46	1	0	56	6	4	3	21
		October	3	30	2	4	18	29	14	18	5	23	2	8	7	9	7	1	4	7	2	1	9	7	36	9	7	64	3	5	2	30
		November	5	22	4	16	18	41	15	16	14	25	3	17	7	14	4	5	2	2	1	3	5	0	39	6	2	39	9	1	3	24
	Summer	December	11	23	1	19	19	23	29	5	0	10	6	7	28	7	1	0	5	3	1	3	2	4	27	4	10	31	7	2	5	18
2016		January	5	13	0	21	16	20	9	6	1	9	15	6	13	9	9	10	4	1	1	6	10	1	30	3	2	54	4	2	1	17
		Februrary	7	9	1	10	13	17	7	9	0	15	1	11	5	5	9	6	2	2	1	1	8	2	18	4	0	57	4	0	2	20
	Autumn	March	3	5	0	4	16	22	9	6	0	15	1	13	17	7	2	4	3	3	2	3	7	1	9	6	0	36	5	0	2	16
		April	3	10	0	5	9	26	5	5	0	35	5	6	5	7	5	2	2	2	1	0	6	3	26	4	0	38	11	3	2	13
		May	5	9	0	1	10	16	0	6	0	19	2	3	7	5	4	2	0	2	0	4	9	4	15	2	0	42	12	3	14	10
	Winter	June	1	6	1	2	12	10	2	2	2	20	0	1	7	8	3	0	11	4	0	1	19	4	9	6	0	41	16	2	4	13
		July	2	5	2	3	15	10	5	1	4	15	3	5	7	4	2	2	2	1	2	3	14	5	16	6	0	36	11	4	4	3
		August	2	10	0	4	12	16	12	6	4	12	6	17	6	2	1	0	2	1	0	0	14	5	24	11	0	68	14	4	0	4
	Spring	September	1	14	1	3	20	35	14	18	5	8	4	9	14	16	1	2	5	2	1	2	12	1	20	10	0	66	10	7	3	11
		October	7	24	0	4	11	44	6	14	5	18	7	7	6	25	2	2	3	5	1	6	11	5	37	8	1	72	9	4	1	33
		November	7	20	0	7	27	61	5	14	3	13	4	47	7	11	3	2	4	2	1	10	16	2	30	18	3	84	12	4	12	95
	Summer	December	7	18	1	42	23	69	4	6	3	22	2	14	6	16	4	1	1	2	0	4	18	2	13	15	10	73	5	0	5	22
2017		January	4	14	0	23	23	49	11	5	6	17	5	13	58	13	3	3	6	2	1	2	5	0	25	4	0	64	5	1	14	14
		Februrary	6	6	0	14	15	23	9	1	0	12	3	7	12	8	2	3	7	14	2	4	6	2	15	6	0	69	8	1	6	14
	Autumn	March	6	5	0	4	21	34	6	6	4	25	5	8	11	17	18	0	5	7	0	3	10	1	18	11	0	60	7	2	7	13
		April	3	7	0	2	10	29	3	2	1	30	0	4	9	5	13	3	1	3	1	4	8	1	18	7	0	51	12	7	7	11
		May	2	11	1	4	14	36	16	5	4	24	2	3	5	5	8	1	0	2	3	0	1	3	24	5	0	47	10	13	10	8
	Winter	June	3	7	2	1	6	10	8	6	0	15	3	3	5	0	3	0	4	1	1	2	9	1	16	2	0	48	12	3	3	23
		July	4	3	1	1	13	13	2	6	1	9	3	10	9	2	3	0	1	0	0	2	14	0	31	5	0	67	16	7	0	21
		August	6	8	0	2	15	22	5	11	2	8	4	23	9	5	2	3	11	1	2	4	8	2	45	9	0	52	17	2	4	18
	Spring	September	6	32	0	4	17	26	9	13	5	13	5	6	14	6	2	3	0	2	0	4	6	2	44	8	0	61	9	4	1	27
		October	3	27	0	8	26	43	10	16	4	19	3	5	6	8	7	4	3	4	2	4	8	3	28	12	0	75	3	1	1	29
		November	5	10	0	10	13	33	5	5	4	21	3	6	4	9	31	1	2	0	3	4	10	0	13	4	3	72	5	3	4	25
	Summer	December	5	24	1	25	21	27	6	10	5	24	1	23	8	11	10	0	3	1	6	2	4	0	15	1	9	69	7	3	6	17
