# Supplementary material for: The impact of human activities on Australian wildlife
Source: PLoS One. 2019 Jan 23;14(1):e0206958. doi: 10.1371/journal.pone.0206958 (PMC6344025; doi:10.1371/journal.pone.0206958)
Supplement: S2 Table — (XLSX) [file pone.0206958.s004.xlsx]

## Sheet: SUPPTbl2_CausesForAdmission_110
Supporting Table 2: Admissions to AZWH in each CFA category.
Animal group	Species	N Known COA	Abnormal animal location	Boat Strike	Cat Attack	Dog Attack	Drowning	Electrocuted	Entangle-ments1	Fell out of tree	Fire2	Fishing tackle ingestion	Hit by Car	Hit window	Machine injury	Malicious injury/ poisoning	Natural predation	Oiling	Orphaned/Dependent Young	Overt signs of disease	Tree felling
AVIANS	Australian Brush-turkey	431	5	0	123	62	4	0	40	1	0	0	140	1	1	7	22	0	19	6	0
	Australian Magpie	1263	17	0	32	45	2	3	94	42	0	1	427	5	1	47	37	9	354	146	1
	Australian Pelican	245	4	1	0	1	0	0	162	0	0	7	6	0	0	20	0	0	1	43	0
	Fig Bird	762	3	0	59	4	1	0	4	36	0	0	188	37	2	3	24	0	391	9	1
	Laughing Kookaburra	1741	22	0	19	54	86	0	96	23	0	0	1211	15	0	11	23	11	153	13	4
	Lorikeets	2625	81	0	76	96	13	0	29	28	0	0	1088	155	0	7	64	3	168	777	40
	Native Ducks	948	10	0	16	20	2	0	33	1	0	3	186	3	0	12	12	2	628	20	0
	Noisy Minor	842	8	0	93	21	7	0	12	30	0	0	365	15	1	3	23	3	250	11	0
	Raptors	351	14	0	0	3	7	0	38	5	0	1	203	10	1	9	12	0	35	13	0
	Tawny Frog Mouth	1920	22	0	9	17	3	1	116	28	0	0	1402	11	1	16	24	0	207	63	0
	Total	11128	186	1	427	323	125	4	624	194	0	12	5216	252	7	135	241	28	2206	1101	46
REPTILES	Bearded Dragon	404	3	0	26	89	1	0	4	1	1	0	186	0	5	3	3	0	70	11	1
	Blue-tongued Skink	930	6	0	96	535	12	0	6	0	0	0	132	0	19	6	8	0	97	12	1
	Carpet Python	888	20	0	13	104	2	1	72	4	1	0	407	0	40	15	16	1	154	35	3
	Eastern Water Dragon	856	18	0	93	185	8	0	70	0	0	0	193	0	14	12	69	2	176	16	0
	Freshwater Turtle	646	29	0	1	21	1	0	39	0	0	24	461	0	4	2	4	0	47	13	0
	Green Tree Snake	243	3	0	69	66	0	0	20	1	0	0	52	0	6	1	3	0	17	3	2
	Lace Monitor	306	1	0	3	73	0	0	3	1	0	0	157	0	1	2	0	0	19	6	40
	Venomous Snakes	295	6	0	94	42	1	0	51	0	0	0	42	0	15	9	5	1	24	4	1
	Total	4568	86	0	395	1115	25	1	265	7	2	24	1630	0	104	50	108	4	604	100	48
AMPHIBIANS	Tree Frogs	106	7	0	9	12	1	0	4	0	0	0	37	0	8	3	13	1	1	10	0
	Total	106	7	0	9	12	1	0	4	0	0	0	37	0	8	3	13	1	1	10	0
MARSUPIAL MAMMALS	Bandicoots	367	4	0	66	41	20	0	2	0	1	0	90	0	4	0	4	0	130	4	1
	Eastern Grey Kangaroo	1165	4	0	0	51	1	0	85	1	0	0	506	0	0	3	1	0	452	61	0
	Feathertail Glider	230	19	0	114	8	4	0	1	6	1	0	0	0	0	0	0	5	62	2	8
	Koala	3590	74	0	1	496	10	1	25	79	2	0	1306	0	1	0	6	0	377	1207	5
	Large Gliders	754	10	0	186	46	2	1	164	29	0	0	30	1	1	3	26	0	232	9	14
	Marsupial Dasyurid	190	2	0	15	4	0	0	0	0	0	0	1	0	0	1	1	0	164	2	0
	Possums	5615	116	0	361	609	9	114	28	116	7	0	1252	0	10	84	132	4	2314	441	18
	Small Macropods	1139	1	0	2	36	5	0	25	0	0	0	361	0	0	2	3	0	666	38	0
	Total	13050	230	0	745	1291	51	116	330	231	11	0	3546	1	16	93	173	9	4397	1764	46
EUTHERIAN MAMMALS	Echidna	453	8	0	1	63	4	0	3	0	1	0	327	0	4	0	0	0	34	7	1
	Flying Foxes	2026	33	0	13	105	5	54	1034	21	0	0	208	8	0	5	24	1	459	54	2
	Microbats	295	55	0	77	4	19	1	14	4	1	0	9	11	2	2	2	1	70	21	2
	Total	2774	96	0	91	172	28	55	1051	25	2	0	544	19	6	7	26	2	563	82	5
TOTAL NUMBER of admissions per CFA		31626	605	1	1667	2913	230	176	2274	457	15	36	10973	272	141	288	561	44	7771	3057	145
PROPORTION (%) of all admissions			0.0191298	3.16196e-05	0.0527098	0.0921078	0.0072725	0.00556504	0.0719029	0.0144501	0.000474293	0.0011383	0.346961	0.00860052	0.00445836	0.00910643	0.0177386	0.00139126	0.245716	0.096661	0.00458484
1 Entanglements includes netting, fencing, fishing line and other entanglements
2 Fire includes bush and other fires
